# Supplementary material for: A functional ruthenium(ii) complex for imaging biothiols in living bodies
Source: Royal Society of Chemistry journal article supplement (doi:10.1039/c5dt00290g), 2015-01-01
Supplement: c5dt00290g1.pdf [file c5dt00290g1.pdf]

Electronic Supplementary Information for

## A functional ruthenium(II) complex for imaging biothiols in living body

Zhiqiang Ye, Quankun Gao, Xin An, Bo Song and Jingli Yuan\*

State Key Laboratory of Fine Chemicals, School of Chemistry, Dalian University of Technology,  
Dalian 116024, P. R. China.

\*Corresponding authors. Tel/Fax: +86-411-84986042. E-mail: jlyuan@dlut.edu.cn

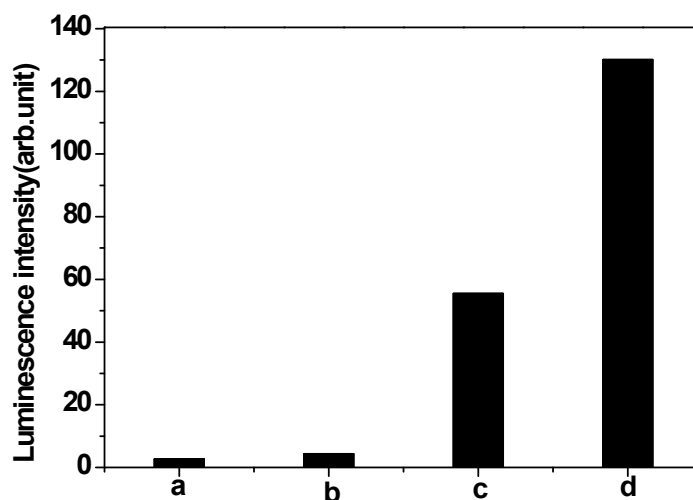

**Fig. S1.** Luminescence intensities of  $[\text{Ru}(\text{bpy})_2(\text{DNS-bpy})](\text{PF}_6)_2$  ( $10 \mu\text{M}$ ) upon addition of various species ( $500 \mu\text{M}$ ) in 1:4 ethanol-50 mM HEPES buffer of pH 7.2. (a) blank; (b)  $\text{H}_2\text{S}$ ; (c) Cys; (d) N-acetylcysteine.

**MTT Assay.** NCI-H1688 cells were cultured in RPMI-1640 medium (Sigma-Aldrich, Inc.), supplemented with 10 % fetal bovine serum (Corning Incorporated), 1 % penicillin (Gibco), and 1 % streptomycin (Gibco) at a density of  $10^5$  cells/mL in a tissue culture plate. After  $[\text{Ru}(\text{bpy})_2(\text{DNS-bpy})](\text{PF}_6)_2$  (final concentration: 0, 50, 100, 150, 200  $\mu\text{M}$ ) was added to the medium, the cells were incubated at 37 °C in a 5 %  $\text{CO}_2$ /95 % air incubator for 4 h, and then the culture medium was removed. The cells were further incubated for 4 h in the culture medium containing 20  $\mu\text{L}$  of a PBS solution of 3-(4,5-dimethyl-2-thiazoyl)-2,5-diphenyltetrazolium bromide (MTT, Sigma, final concentration: 833  $\mu\text{g}/\text{mL}$ ). After the supernatants were removed, the cells were dissolved in 80  $\mu\text{L}$  DMSO and then the absorbance at 540 nm was measured in a Infinite M200 Pro Microplate Reader.

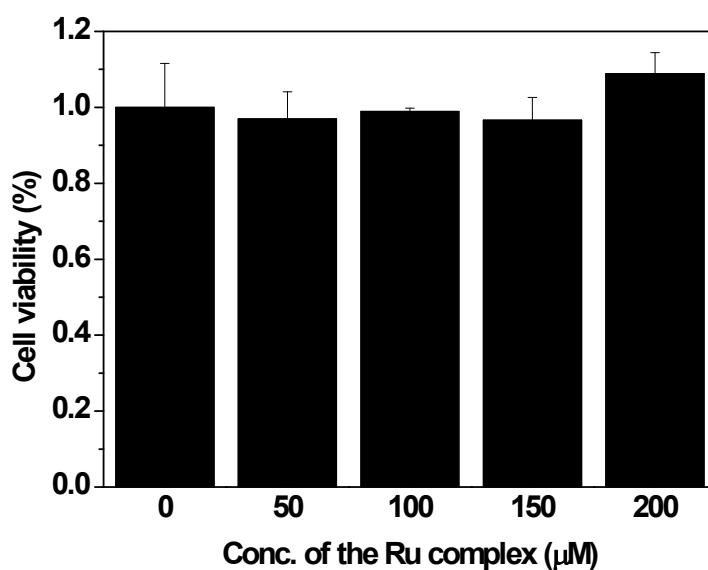

**Fig. S2.** Viabilities of the NCI-H1688 cells after incubated with different concentrations of  $[\text{Ru}(\text{bpy})_2(\text{DNS-bpy})](\text{PF}_6)_2$  for 4 h.
